# Supplementary material for: Andrographis Reverses Gemcitabine Resistance through Regulation of ERBB3 and Calcium Signaling Pathway in Pancreatic Ductal Adenocarcinoma
Source: MDPI journal article supplement (doi:10.3390/biomedicines11010119), 2023-01-03
Supplement: s1 [file s1]

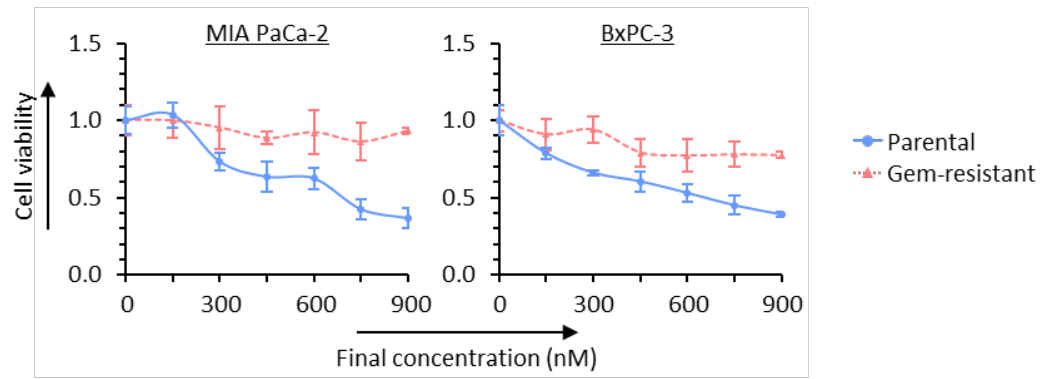

**Supplementary figure S1:** CCK-8 assays comparing cell viability following treatment with Gemcitabine for 48 hours in parental and Gem-R PDAC cells. Error bars are the mean  $\pm$  SD. Gem-R, Gemcitabine-resistant; PDAC, pancreatic ductal adenocarcinoma.

**Supplementary table S1:** Patient characteristics of the TCGA dataset

|                                   | TCGA      |             |
|-----------------------------------|-----------|-------------|
|                                   | (n = 178) |             |
|                                   | n         | (%)         |
| Age, mean ( $\pm$ SD) (years)     | 65        | ( $\pm$ 11) |
| Sex                               |           |             |
| Male                              | 98        | (55)        |
| Female                            | 80        | (45)        |
| Tumor location                    |           |             |
| Head                              | 139       | (78)        |
| Body                              | 14        | (8)         |
| Tail                              | 14        | (8)         |
| Unknown                           | 11        | (6)         |
| Tumor size, mean ( $\pm$ SD) (mm) | 39        | ( $\pm$ 17) |
| T stage                           |           |             |
| 1-2                               | 31        | (17)        |
| 3-4                               | 145       | (82)        |
| Unknown                           | 2         | (1)         |
| Lymph node metastases             |           |             |
| Negative                          | 49        | (27)        |
| Positive                          | 124       | (70)        |
| Unknown                           | 5         | (3)         |
| Stage                             |           |             |
| I-II                              | 168       | (94)        |
| III-IV                            | 8         | (4)         |
| Unknown                           | 2         | (1)         |

SD, standard deviation

**Supplementary table S2:** Patient characteristics of the clinical cohort

|                                   | <b>Total</b><br>(n = 37) |             |
|-----------------------------------|--------------------------|-------------|
|                                   | n                        | (%)         |
| Age, mean ( $\pm$ SD) (years)     | 67                       | ( $\pm$ 9)  |
| Sex                               |                          |             |
| Male                              | 21                       | (57)        |
| Female                            | 16                       | (43)        |
| Tumor location                    |                          |             |
| Head                              | 12                       | (32)        |
| Body                              | 20                       | (54)        |
| Tail                              | 5                        | (14)        |
| Tumor size, mean ( $\pm$ SD) (mm) | 43                       | ( $\pm$ 15) |
| T stage                           |                          |             |
| 3                                 | 14                       | (38)        |
| 4                                 | 23                       | (62)        |
| Lymph node metastases             |                          |             |
| Negative                          | 12                       | (32)        |
| Positive                          | 25                       | (68)        |
| Stage                             |                          |             |
| III                               | 4                        | (11)        |
| IV                                | 33                       | (89)        |
| Regimen                           |                          |             |
| Gem + nab-paclitaxel              | 35                       | (95)        |
| Gem + S-1                         | 2                        | (5)         |
| RECIST 1.1                        |                          |             |
| PR                                | 10                       | (27)        |
| SD                                | 13                       | (35)        |
| PD                                | 14                       | (38)        |
| Responders or Non-responders      |                          |             |
| Responders                        | 23                       | (62)        |
| Non-responders                    | 14                       | (38)        |

SD, standard deviation; RECIST, response evaluation criteria in solid tumors; PR, partial response; SD, stable disease; PD, progressive disease; Gem, Gemcitabine; nab-paclitaxel, albumin-bound Paclitaxel; S-1, Tegafur /Gimeracil /Oteracil

**Supplementary table S3:** Primer sequences and their PCR conditions in this study

| Gene             | Sense                  | Antisense              | Size of<br>the PCR<br>products<br>(bp) | Annealing<br>temp (°C) | GenBank<br>accession No |
|------------------|------------------------|------------------------|----------------------------------------|------------------------|-------------------------|
| <i>ERBB3</i>     | GACCCAGGTCTACGATGGGAA  | GTGAGCTGAGTCAAGCGGAG   | 99                                     | 60                     | NM_001982               |
| <i>Bcl-2</i>     | GGTGCCACCTGTGGTCCACCTG | CTTCACTTGTGGCCAGATAGG  | 459                                    | 60                     | NM_000633               |
| <i>Cyclin D1</i> | ACCTGGATGCTGGAGGTCT    | GCTCCATTTCAGCAGCTC     | 241                                    | 60                     | NM_053056               |
| <i>Caspase-3</i> | CAAACTTTTTCAGAGGGGATCG | GCATACTGTTTCAGCATGGCAC | 262                                    | 60                     | NM_032991               |
| <i>β-actin</i>   | AGAGCTACGAGCTGCCTGAC   | AGCACTGTGTTGGCGTACAG   | 184                                    | 60                     | NM_001101               |
